# Supplementary material for: Synergistic effect of the heterojunction g-C3N4/Bi2MoO6/clinoptilolite to enhance the photocatalytic degradation of antibiotics in water in the presence of persulfate
Source: Royal Society of Chemistry journal article supplement (doi:10.1039/d4ew00549j), 2024-01-01
Supplement: d4ew00549j1.pdf [file d4ew00549j1.pdf]

Electronic Supplementary Information

Table S1. Physical and chemical properties of oxytetracycline

| Antibiotic               | Molecular<br>formular                                         | Chemical structure                                                                | Molecular<br>weight<br>(g/mol) | $\lambda_{\max}$<br>(nm) | Water<br>solubility<br>(mg/L) | pKa                                                                        | Existing                                                                             |
|--------------------------|---------------------------------------------------------------|-----------------------------------------------------------------------------------|--------------------------------|--------------------------|-------------------------------|----------------------------------------------------------------------------|--------------------------------------------------------------------------------------|
| Oxytetracycline<br>(OTC) | C <sub>22</sub> H <sub>24</sub> N <sub>2</sub> O <sub>9</sub> | 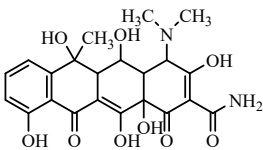 | 460.4                          | 276 and<br>354 nm        | 200                           | pKa <sub>1</sub> =3.37<br>pKa <sub>2</sub> =7.49<br>pKa <sub>2</sub> =9.88 | OTC <sup>+</sup> , OTC <sup>zwitterion</sup><br>OTC <sup>-</sup> , OTC <sup>2-</sup> |

Table S2. The pore and surface characterization of different samples

| <b>Catalyst</b>                  | <b>BET surface area (m<sup>2</sup>/g)<sup>(a)</sup></b> | <b>Pore volume (cm<sup>3</sup>/g)<sup>(b)</sup></b> | <b>Pore size (nm)<sup>(c)</sup></b> |
|----------------------------------|---------------------------------------------------------|-----------------------------------------------------|-------------------------------------|
| Natural clinoptilolite           | 36.21                                                   | 0.097                                               | 12.18                               |
| Activated clinoptilolite         | 75.76                                                   | 0.105                                               | 11.62                               |
| g-C <sub>3</sub> N <sub>4</sub>  | 34.41                                                   | 0.127                                               | 15.83                               |
| Bi <sub>2</sub> MoO <sub>6</sub> | 37.14                                                   | 0.169                                               | 16.21                               |
| CNBC30                           | 48.55                                                   | 0.130                                               | 11.55                               |

(a) The specific surface area was calculated by BET method

(b) The pore volume was obtained from the BJH desorption cumulative volume of pores between 1.70 nm and 300.00 nm width

(c) The BJH Desorption average pore width

Table S3. Comparison of the degradation of organic pollutants by various photocatalysts supported on clinoptilolite

| Catalyst and fabricated method                                                                                                            | Organic pollutants                                            | Reaction conditions                                                                                                                | Results                                                                                                                                            | Remarks                                                                                                                                                                                                         | References |
|-------------------------------------------------------------------------------------------------------------------------------------------|---------------------------------------------------------------|------------------------------------------------------------------------------------------------------------------------------------|----------------------------------------------------------------------------------------------------------------------------------------------------|-----------------------------------------------------------------------------------------------------------------------------------------------------------------------------------------------------------------|------------|
| MoS <sub>2</sub> /TiO <sub>2</sub> /clinoptilolite (MTC3 – 1mmol Na <sub>2</sub> MoO <sub>4</sub> ·2H <sub>2</sub> O) 2-step hydrothermal | Sodium isopropyl xanthate (SIPX) ( $\lambda_{\max}$ = 301 nm) | [catalyst] = 0.4 g/L, [SIPX] = 10 mg/L, 400W Xe lamp                                                                               | SIPX: 97.3 % (3 h)<br>Main ROS: $h^+ < e^- < OH^\bullet < O_2^{\bullet-}$                                                                          | - Complicated synthesis process<br>- Long degradation duration                                                                                                                                                  | 1          |
| TiO <sub>2</sub> /NCP (96.6 % NCP) Heating                                                                                                | Atenolol ( $\lambda_{\max}$ = 284 nm)                         | [catalyst] = 3 g/L, [atenolol] = 10 mg/L <sup>1</sup> , UV lamp 60 W,                                                              | Atenolol: 75 % (1h)<br>Main ROS: $h^+$ and $OH^\bullet$<br>Mineralization efficiency: 74 %<br>Final products: CO <sub>2</sub> and H <sub>2</sub> O | - High energy requirement due to calcination at high temperature<br>- Low degradation efficiency<br>- High cost due to UV light<br>- Great amount of catalyst<br>- Degradation efficiency decreased at pH > 6.0 | 2          |
| ZnO/Fe <sub>2</sub> O <sub>3</sub> /Clinoptilolite (44 % Clinoptilolite, Fe <sup>3+</sup> /ZnO = 0.06) Sol-Gel                            | Metronidazole (MNZ) ( $\lambda_{\max}$ = 254 nm)              | [catalyst] = 1 g/L, [MNZ] = 60 mg/L, [H <sub>2</sub> O <sub>2</sub> ] = 40 mg/L, pH = 10<br>UV lamp 8 W,<br>reaction time = 90 min | MNZ: 99 % (90 min)                                                                                                                                 | - Narrow pH range, good performance at base medium<br>- High cost due to UV light<br>- Great amount of catalyst                                                                                                 | 3          |

| Catalyst and fabricated method                                                                                                                              | Organic pollutants                                            | Reaction conditions                                                                                   | Results                                                                                               | Remarks                                                                                                                                               | References |
|-------------------------------------------------------------------------------------------------------------------------------------------------------------|---------------------------------------------------------------|-------------------------------------------------------------------------------------------------------|-------------------------------------------------------------------------------------------------------|-------------------------------------------------------------------------------------------------------------------------------------------------------|------------|
| TiO <sub>2</sub> /Fe <sub>2</sub> O <sub>3</sub> /Clinoptilolite (Fe <sup>3+</sup> /TiO <sub>2</sub> = 0.6, 25 % Clinoptilolite) Hydrothermal               | Diphenhydramine (DPH) ( $\lambda_{\max}$ = 258 nm)            | [catalyst] = 0.5 g/L, pH=5, [DPH] = 50 mg/L, [H <sub>2</sub> O <sub>2</sub> ] = 50 mg/L, UV lamp 6 W  | 80 % DPH (120 min)                                                                                    | - High energy requirement due to calcination at high temperature<br>- Narrow pH range, good performance at acid medium<br>- High cost due to UV light | 4          |
| ZnO/Fe <sub>2</sub> O <sub>3</sub> /Clinoptilolite (Fe <sup>3+</sup> /ZnO = 0.6, 25 % Clinoptilolite) Sol-Gel                                               | Diphenhydramine (DPH) ( $\lambda_{\max}$ = 258 nm)            | [catalyst] = 0.5 g/L, pH=10, [DPH] = 50 mg/L, [H <sub>2</sub> O <sub>2</sub> ] = 50 mg/L, UV lamp 6 W | 95 % DPH (100 min)                                                                                    | - Narrow pH range, good performance at base medium<br>- High cost due to UV light                                                                     | 5          |
| BiOCl/TiO <sub>2</sub> /clinoptilolite (TiO <sub>2</sub> /clinoptilolite = 1.5, BTC1 - 0.25 mmol Bi <sup>3+</sup> ) Hydrothermal + water bath precipitation | Sodium isopropyl xanthate (SIPX) ( $\lambda_{\max}$ = 301 nm) | [catalyst] = 0.2 g/L, [SIPX] = 20 mg/L, 400W Xe lamp                                                  | SIPX: > 90 % (3 h)<br>Main ROS: e <sup>-</sup> < OH• < h <sup>+</sup> < O <sub>2</sub> • <sup>-</sup> | - Complicated synthesis process<br>- Long degradation duration                                                                                        | 6          |
| TiO <sub>2</sub> /CLP/graphene (30% clinoptilolite, 1 % graphene) Hydrothermal + Solvothermal                                                               | Nitenpyram ( $\lambda_{\max}$ < 400 nm)                       | [Nitenpyram] = 80 mg/L, 570 W Xe lamp                                                                 | 100 % Nitenpyram (90 min)<br>Mineralization efficiency: 71%                                           | - Complicated synthesis process<br>- Long degradation duration                                                                                        | 7          |

| Catalyst and fabricated method                                                                                                | Organic pollutants                                         | Reaction conditions                                                                                                                        | Results                                       | Remarks                                                                                                                                            | References |
|-------------------------------------------------------------------------------------------------------------------------------|------------------------------------------------------------|--------------------------------------------------------------------------------------------------------------------------------------------|-----------------------------------------------|----------------------------------------------------------------------------------------------------------------------------------------------------|------------|
|                                                                                                                               |                                                            |                                                                                                                                            | Main ROS: $h^+ < O_2^{\bullet-} < OH^\bullet$ |                                                                                                                                                    |            |
| g-C <sub>3</sub> N <sub>4</sub> /Bi <sub>2</sub> MoO <sub>6</sub> /clinoptilolite (CNBC-30, 30 % clinoptilolite) Solvothermal | Oxytetracycline (OTC) ( $\lambda_{max} = 354 \text{ nm}$ ) | [OTC] = 20 mg/L;<br>[catalyst] = 500 mg/L;<br>[Na <sub>2</sub> S <sub>2</sub> O <sub>8</sub> ] = 1.26 mM;<br>pH initial; L4X 40 W LED lamp | 87.47 % OTC (120 min)                         | - Low dosage of catalysts and PDS<br>- Wide range of pH (3-11)<br>- Environmental friendliness energy (LED light)<br>- High degradation efficiency | This work  |

Table S4. The removal of organic pollutants from water by photocatalysts in the presence of persulfate and visible light

| Photocatalyst                                     | Organic pollutants | Reaction conditions                                        | Time    | Degradation efficiency | Main ROS                                                                                                     | References |
|---------------------------------------------------|--------------------|------------------------------------------------------------|---------|------------------------|--------------------------------------------------------------------------------------------------------------|------------|
| TiO <sub>2</sub> /AB                              | Tetracycline (TC)  | [TC] = 30mg/L<br>[catalyst] = 500 mg/L<br>[PDS] = 3 mM     | 120 min | 93.3 %                 | SO <sub>4</sub> <sup>•-</sup>                                                                                | 8          |
| g-C <sub>3</sub> N <sub>4</sub>                   | Bisphenol A (BPA)  | [BPA] = 5 mg/L<br>[catalyst] = 0.5 g/L<br>[PDS] = 5mM      | 90 min  | 99.5 %                 | O <sub>2</sub> <sup>•-</sup> , h <sup>+</sup>                                                                | 9          |
| CeO <sub>2</sub> /g-C <sub>3</sub> N <sub>4</sub> | Norfloxacin (NOR)  | [NOR] = 10 mg/L<br>[catalyst] = 1 g/L<br>[PDS] = 5 mM      | 60 min  | 88.6 %                 | <sup>1</sup> O <sub>2</sub> , O <sub>2</sub> <sup>•-</sup> , h <sup>+</sup> and OH <sup>•</sup>              | 10         |
| Cu/ZnO/CoFe-CLDH                                  | Bisphenol-A (BPA)  | [BPA] = 10 mg/L<br>[catalyst] = 0.5 g/L<br>[PDS] = 0.148mM | 6 h     | 99 %                   | SO <sub>4</sub> <sup>•-</sup> , OH <sup>•</sup> , O <sub>2</sub> <sup>•-</sup> , <sup>1</sup> O <sub>2</sub> | 11         |
| Bi <sub>2</sub> MoO <sub>6</sub>                  | Tetracycline (TC)  | [TC] = 20 mg/L<br>[catalyst] = 0.5 g/L<br>[PDS] = 16.8 mM  | 60 min  | 95.18 %                | SO <sub>4</sub> <sup>•-</sup> , h <sup>+</sup>                                                               | 12         |
| ZnFe <sub>2</sub> O <sub>4</sub>                  | Bisphenol-A (BPA)  | [BPA] = 10 mg/L<br>[catalyst] = 0.2 g/L<br>[PDS] = 8 mM    | 120min  | 96.5%                  | SO <sub>4</sub> <sup>•-</sup> , OH <sup>•</sup> , h <sup>+</sup>                                             | 9          |

| Photocatalyst                                                                               | Organic pollutants    | Reaction conditions                                         | Time    | Degradation efficiency | Main ROS                                                                        | References |
|---------------------------------------------------------------------------------------------|-----------------------|-------------------------------------------------------------|---------|------------------------|---------------------------------------------------------------------------------|------------|
| g-C <sub>3</sub> N <sub>4</sub> /Bi <sub>2</sub> MoO <sub>6</sub> /clinoptilolite (CNBC-30) | Oxytetracycline (OTC) | [OTC] = 20 mg/L<br>[catalyst] = 500 mg/L<br>[PDS] = 1.26 mM | 120 min | 87.47 %                | <sup>1</sup> O <sub>2</sub> , O <sub>2</sub> <sup>•-</sup> , and h <sup>+</sup> | This work  |

## References

- 1 P. Zhou, Y. Shen, S. Zhao, Y. Chen, S. Gao, W. Liu and D. Wei, Hydrothermal synthesis of novel ternary hierarchical MoS<sub>2</sub>/TiO<sub>2</sub>/clinoptilolite nanocomposites with remarkably enhanced visible light response towards xanthates, *Applied Surface Science*, 2021, **542**, 148578.
- 2 F. Javadi, R. Tayebee and B. Bahramian, TiO<sub>2</sub>/nanoclinoptilolite as an efficient nanocatalyst in the synthesis of substituted 2-aminothiophenes, *Applied Organometallic Chemistry*, 2017, **31**, e3779.
- 3 N. Davari, M. Farhadian and A. R. Solaimany Nazar, Synthesis and characterization of Fe<sub>2</sub>O<sub>3</sub> doped ZnO supported on clinoptilolite for photocatalytic degradation of metronidazole, *Environmental Technology*, 2021, **42**, 1734–1746.
- 4 Z. Esmaili, A. R. Solaimany Nazar and M. Farhadian, Degradation of furfural in contaminated water by titanium and iron oxide nanophotocatalysts based on the natural zeolite (clinoptilolite), *Scientia Iranica*, 2017, **24**, 1221–1229.
- 5 N. Davari, M. Farhadian, A. R. S. Nazar and M. Homayoonfal, Degradation of diphenhydramine by the photocatalysts of ZnO/Fe<sub>2</sub>O<sub>3</sub> and TiO<sub>2</sub>/Fe<sub>2</sub>O<sub>3</sub> based on clinoptilolite: Structural and operational comparison, *Journal of Environmental Chemical Engineering*, 2017, **5**, 5707–5720.
- 6 Y. Tan, C. Li, Z. Sun, C. Liang and S. Zheng, Ternary structural assembly of BiOCl/TiO<sub>2</sub>/clinoptilolite composite: Study of coupled mechanism and photocatalytic performance, *Journal of Colloid and Interface Science*, 2020, **564**, 143–154.
- 7 G. Hosseinzadeh, N. Ghasemian and S. Zinatloo-Ajabshir, TiO<sub>2</sub>/graphene nanocomposite supported on clinoptilolite nanoplate and its enhanced visible light photocatalytic activity, *Inorganic Chemistry Communications*, 2022, **136**, 109144.
- 8 T. Zhang, Y. Liu, Y. Rao, X. Li, D. Yuan, S. Tang and Q. Zhao, Enhanced photocatalytic activity of TiO<sub>2</sub> with acetylene black and persulfate for degradation of tetracycline hydrochloride under visible light, *Chemical Engineering Journal*, 2020, **384**, 123350.
- 9 B. Liu, M. Qiao, Y. Wang, L. Wang, Y. Gong, T. Guo and X. Zhao, Persulfate enhanced photocatalytic degradation of bisphenol A by g-C<sub>3</sub>N<sub>4</sub> nanosheets under visible light irradiation, *Chemosphere*, 2017, **189**, 115–122.

- 10 W. Liu, J. Zhou and J. Yao, Shuttle-like  $\text{CeO}_2/\text{g-C}_3\text{N}_4$  composite combined with persulfate for the enhanced photocatalytic degradation of norfloxacin under visible light, *Ecotoxicology and Environmental Safety*, 2020, **190**, 110062.
- 11 J. Shen, A. Shi, J. Lu, X. Lu, H. Zhang and Z. Jiang, Optimized fabrication of Cu-doped ZnO/calcined CoFe-LDH composite for efficient degradation of bisphenol a through synergistic visible-light photocatalysis and persulfate activation: Performance and mechanisms, *Environmental Pollution*, 2023, **323**, 121186.
- 12 Q. Feng, J. Zhou and Y. Zhang, Coupling  $\text{Bi}_2\text{MoO}_6$  with persulfate for photocatalytic oxidation of tetracycline hydrochloride under visible light, *J Mater Sci: Mater Electron*, 2019, **30**, 19108–19118.



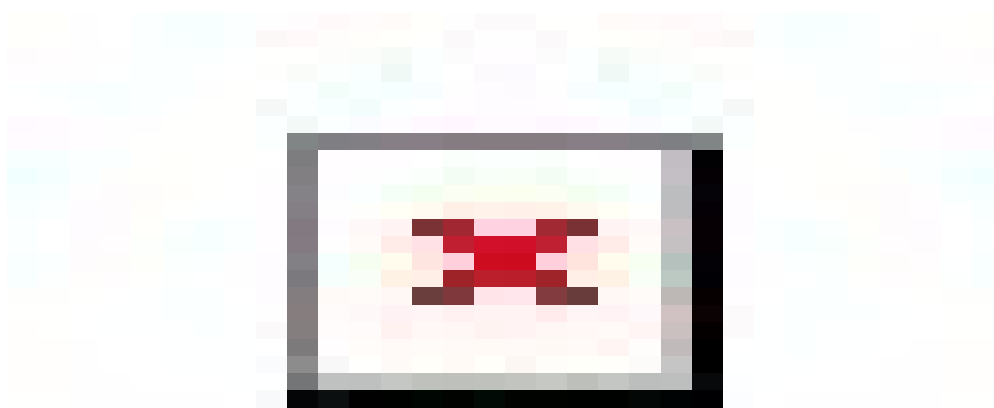

Fig. S1. Calibration curve of oxytetracycline

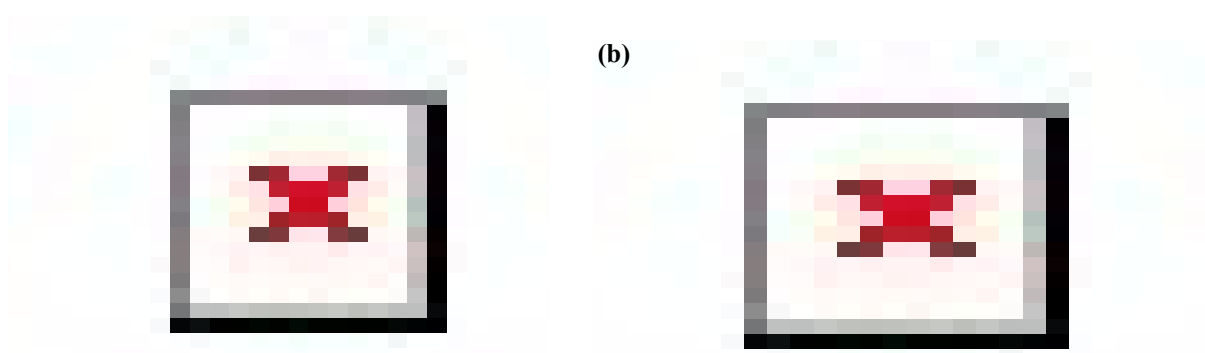

Fig. S2 (a) Mott-Schottky of various catalysts, (b) XPS spectra of survey scan

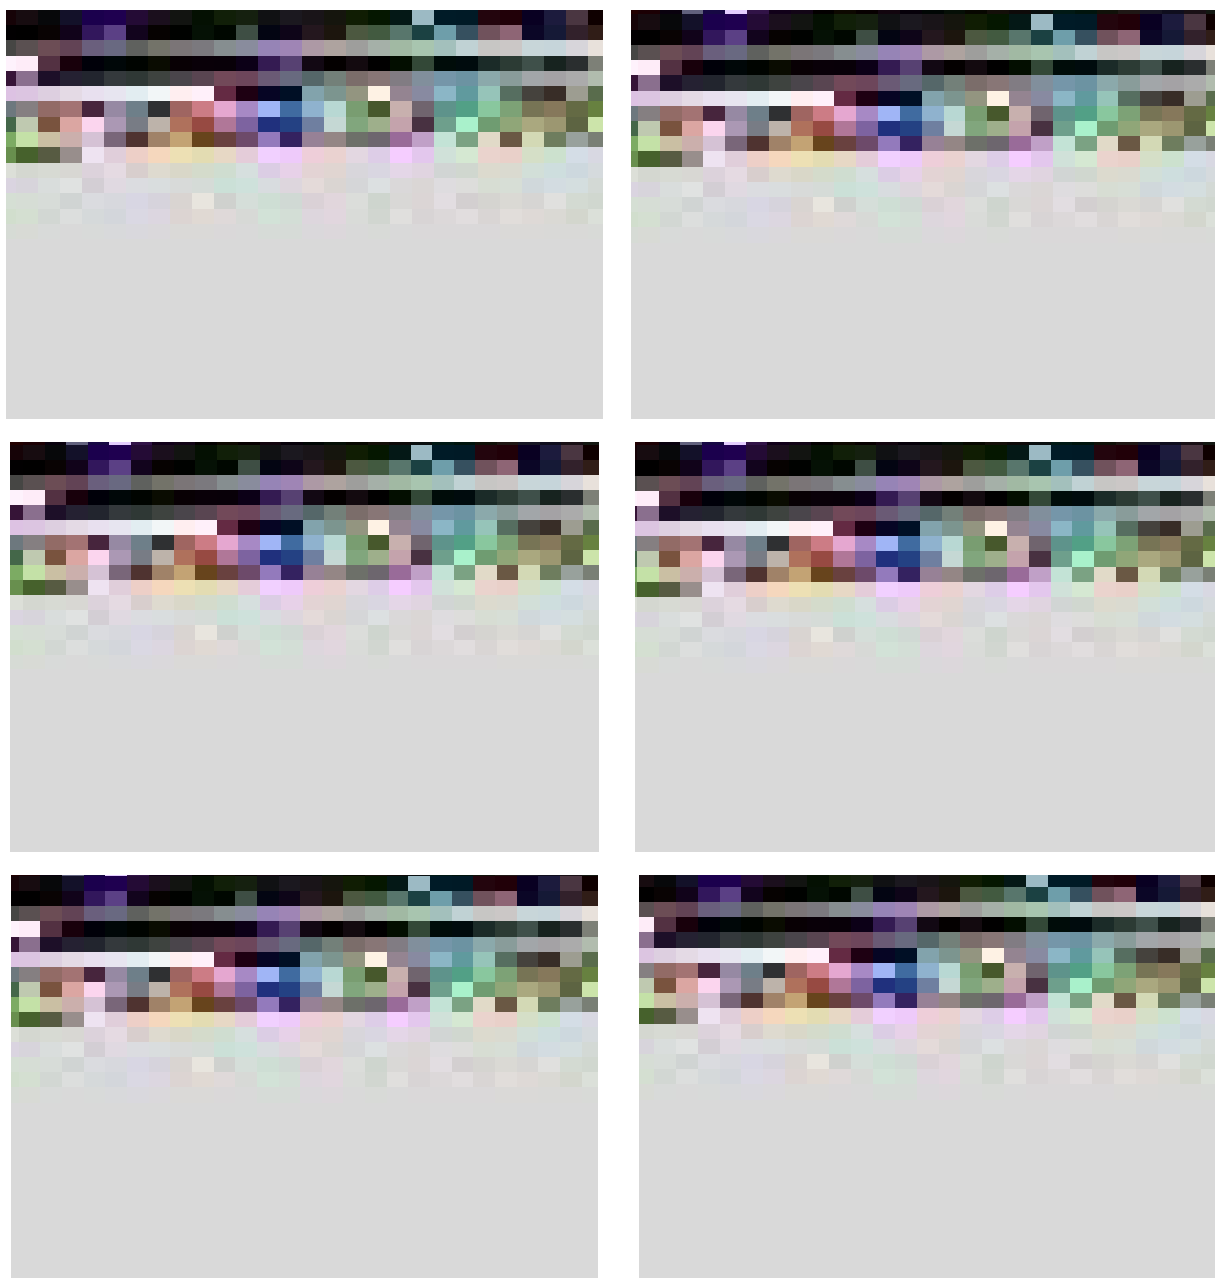

Fig. S3. The  $k_{app}$  values of (a) different systems, (b) % clinoptilolite, (c) catalyst dosage, (d) PDS concentration, (e) initial pH, and (f) OTC concentration  
(Reaction conditons: [OTC] = 10-50 mg/L; [catalyst] = 0-600 mg/L; [Na<sub>2</sub>S<sub>2</sub>O<sub>8</sub>] = 0-2.10 mM; pH = 3-11;  
T=30 °C)

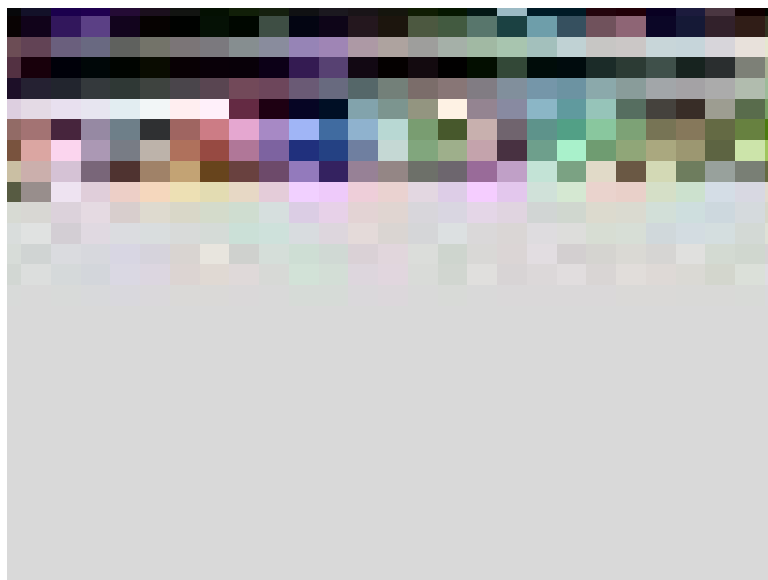

Fig. S4. UV-Vis absorption spectrometry of OTC using CNBC-30 during 120 min (30 min of adsorption and 90 min of photocatalysis)

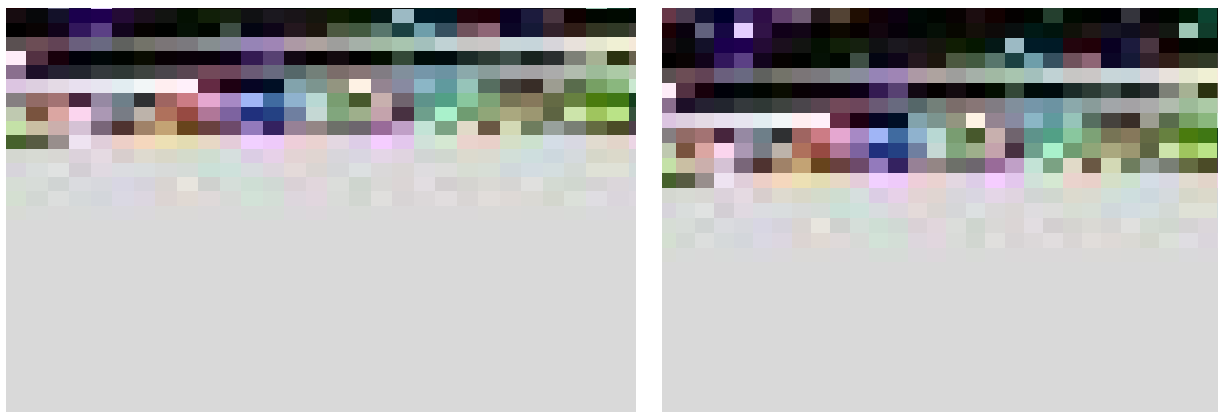

Fig. S5. (a) Schematic diagram of OTC species distribution according to pH and (b)  $\text{pH}_{\text{pzc}}$  of CNBC-30

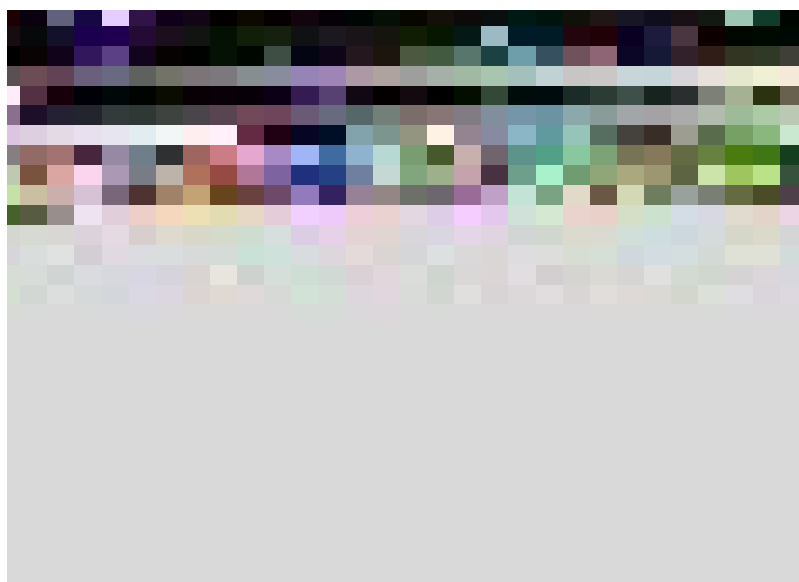

Fig. S6. The  $k_{app}$  values of reaction with the presence of different ions

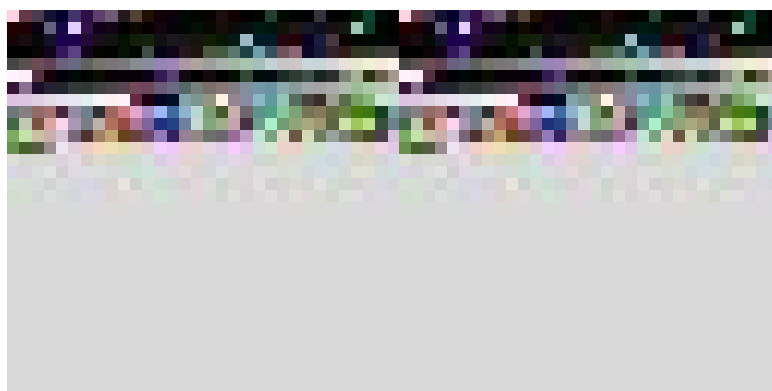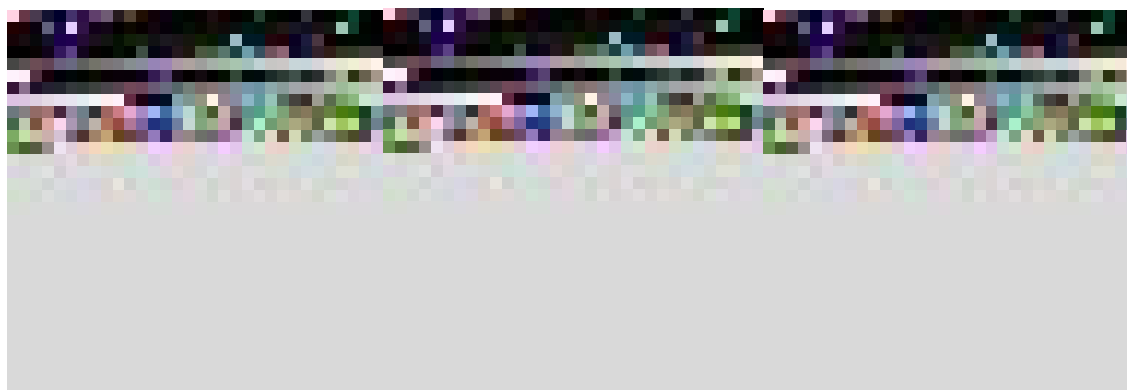

Fig. S7. Mass spectrum of OTC decomposition over time from 0 - 90 minutes
